# Supplementary material for: Favipiravir Does Not Inhibit Chikungunya Virus Replication in Mosquito Cells and Aedes aegypti Mosquitoes
Source: MDPI journal article supplement (doi:10.3390/microorganisms9050944), 2021-04-27
Supplement: s1 [file s1]

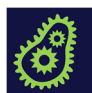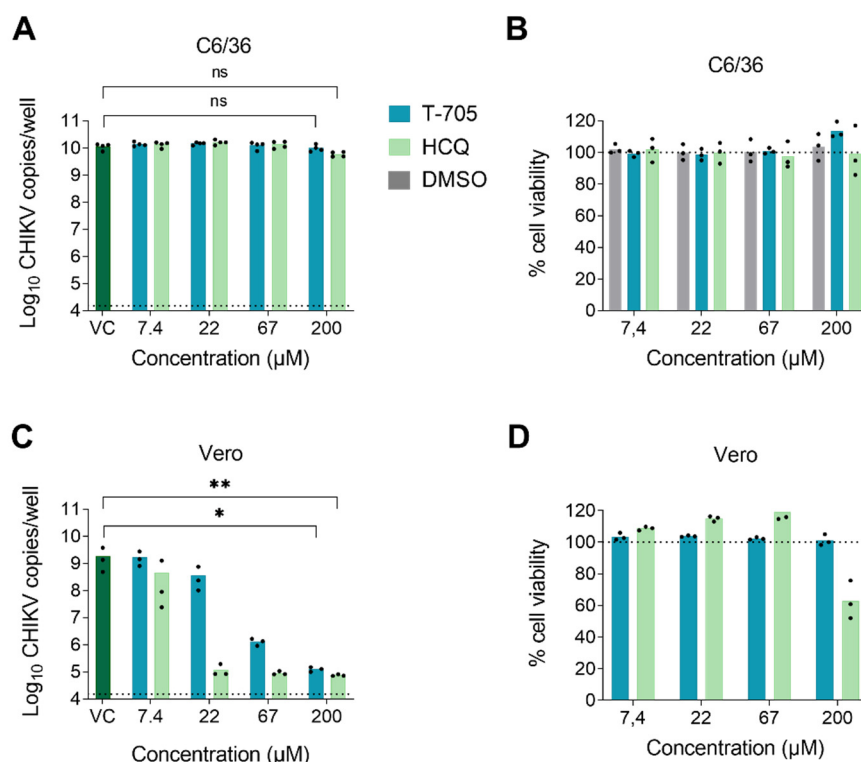

**Figure S1.** T-705 inhibits CHIKV in mammalian Vero cells, but not in *Ae. albopictus*-derived C6/36 cells. Levels of intracellular viral RNA in (a) C6/36 cells and (c) Vero cells at day 3 post-infection following exposure to different compound concentrations. Compound-induced cytotoxic effects in (b) C6/36 cells and (d) Vero cells. 100% cell viability indicates absence of cytotoxic effects. The DMSO treated cells in panel B were exposed to the same DMSO concentrations as the T-705 treated cells. Data shown are the results of at least three independent experiments; bars show the mean value per condition. VC, untreated virus control. (a,c) The dashed line in represents the limit of detection. Statistically significant reductions in (a) CHIKV genome copies or (b) TCID<sub>50</sub> after treatment with different compound concentrations as compared to the VC, were analyzed using the Kruskal-Wallis test (\*  $p < 0.05$ ; \*\*  $p < 0.008$ ).
